# Supplementary material for: Anhedonia and general distress show dissociable ventromedial prefrontal cortex connectivity in major depressive disorder
Source: PubMed Central journal article supplement (PMC5070048; doi:10.1038/tp.2016.80), 2016-05-17
Supplement: tp201680x3.pdf [file tp201680x3.pdf]

### R Caudate

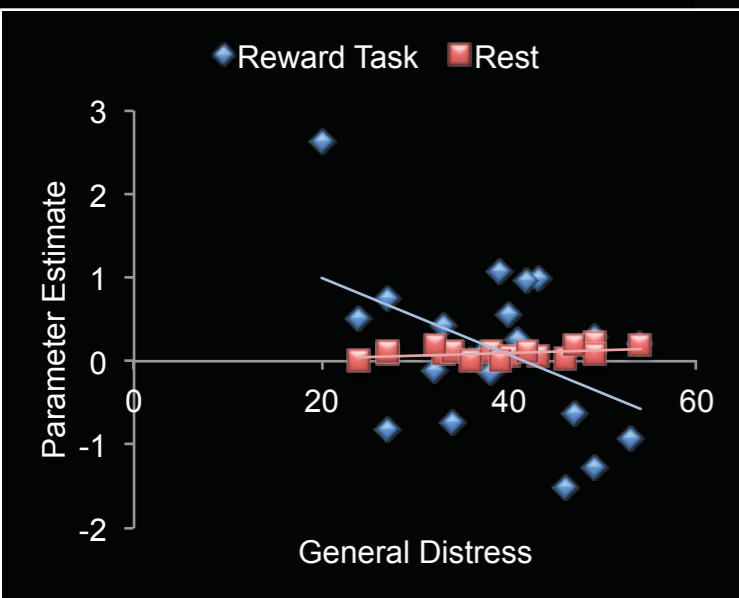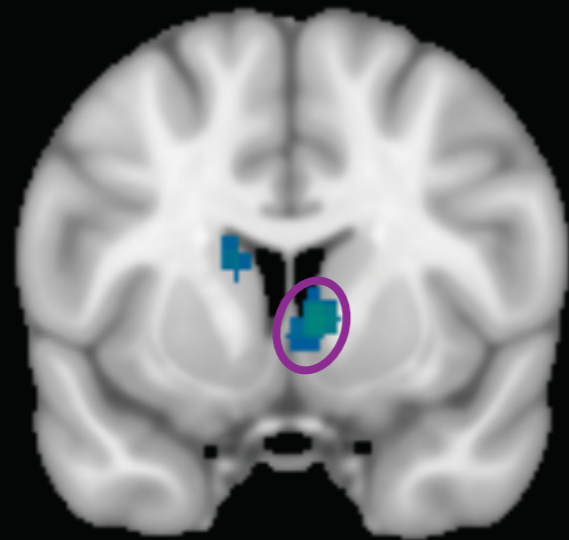

$y = 8$

### R Subcallosal Cortex

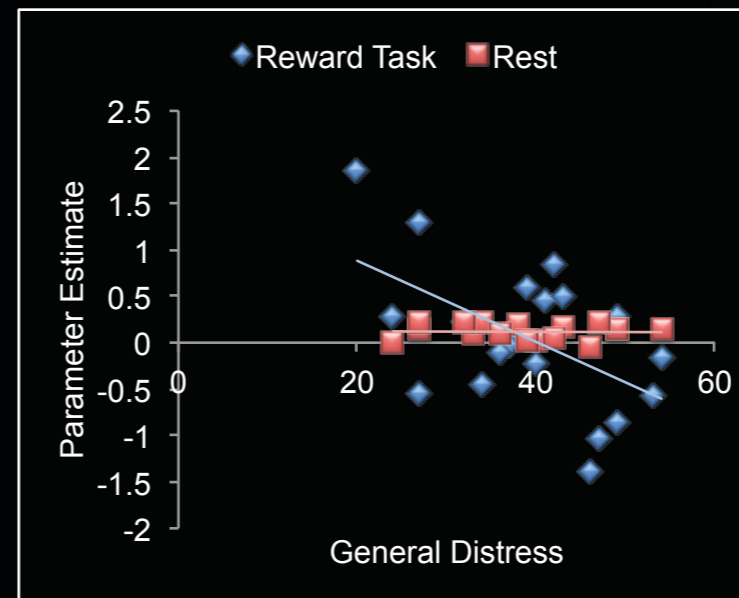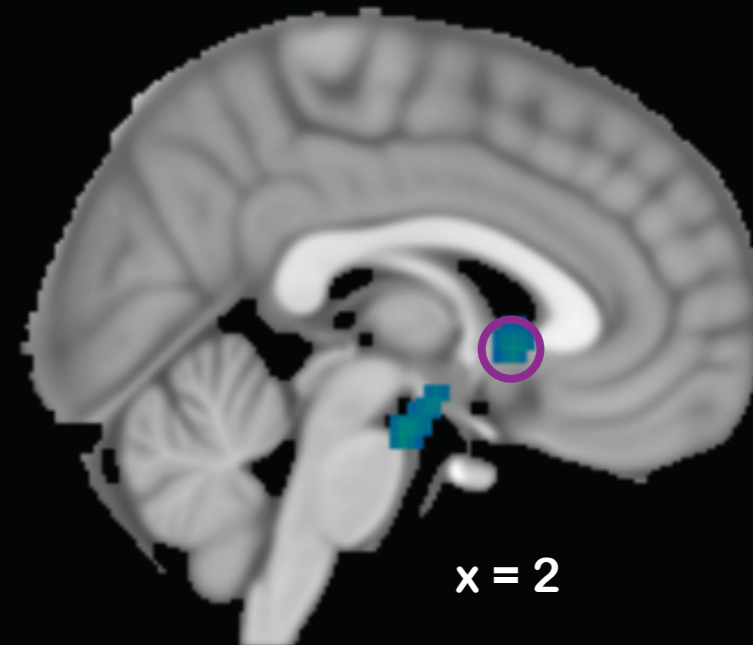

$x = 2$

### R Superior Frontal Gyrus

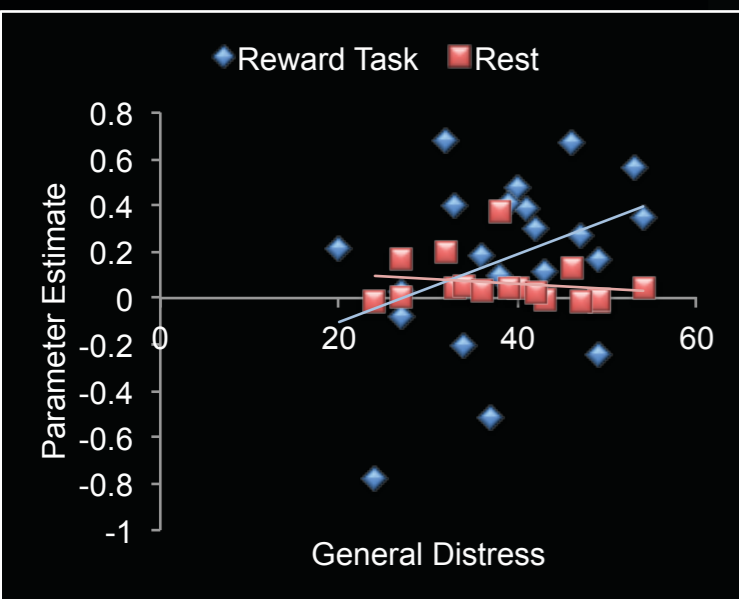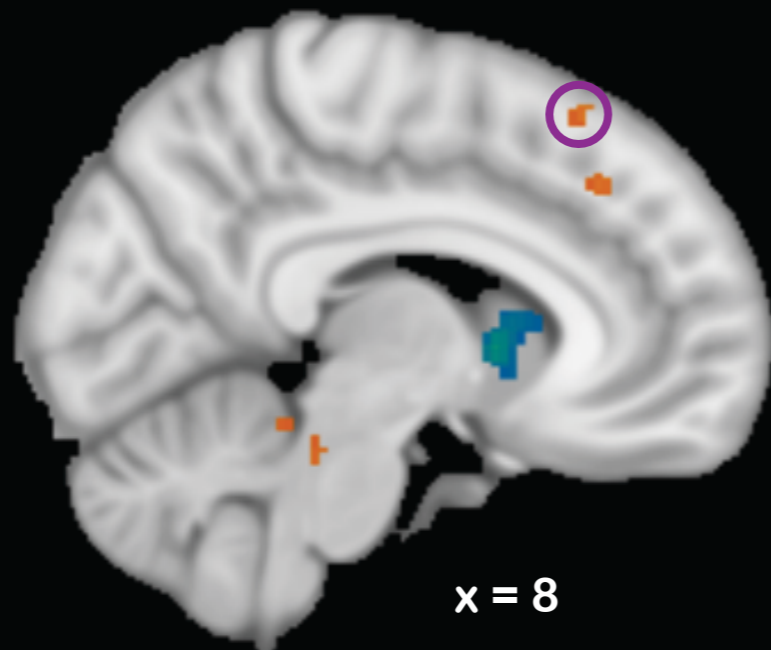

$x = 8$

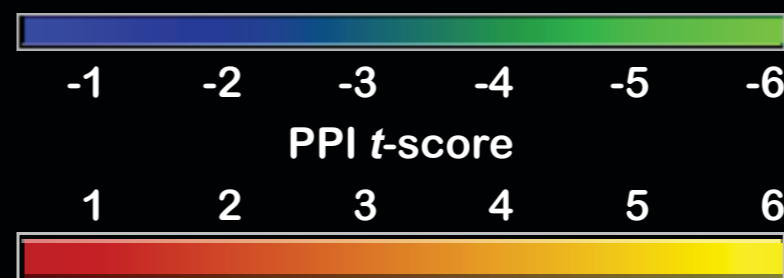

### Posterior VMPFC Seed

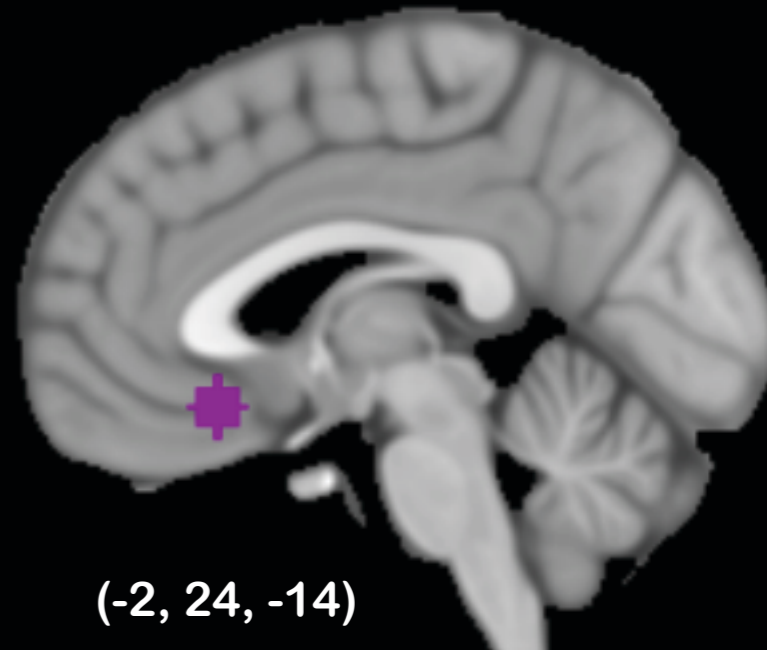

$(-2, 24, -14)$
