# Supplementary material for: Anhedonia and general distress show dissociable ventromedial prefrontal cortex connectivity in major depressive disorder
Source: PubMed Central journal article supplement (PMC5070048; doi:10.1038/tp.2016.80), 2016-05-17
Supplement: tp201680x4.pdf [file tp201680x4.pdf]

# A. Task-Related pVMPFC Connectivity

## Major Depressive Disorder Patients

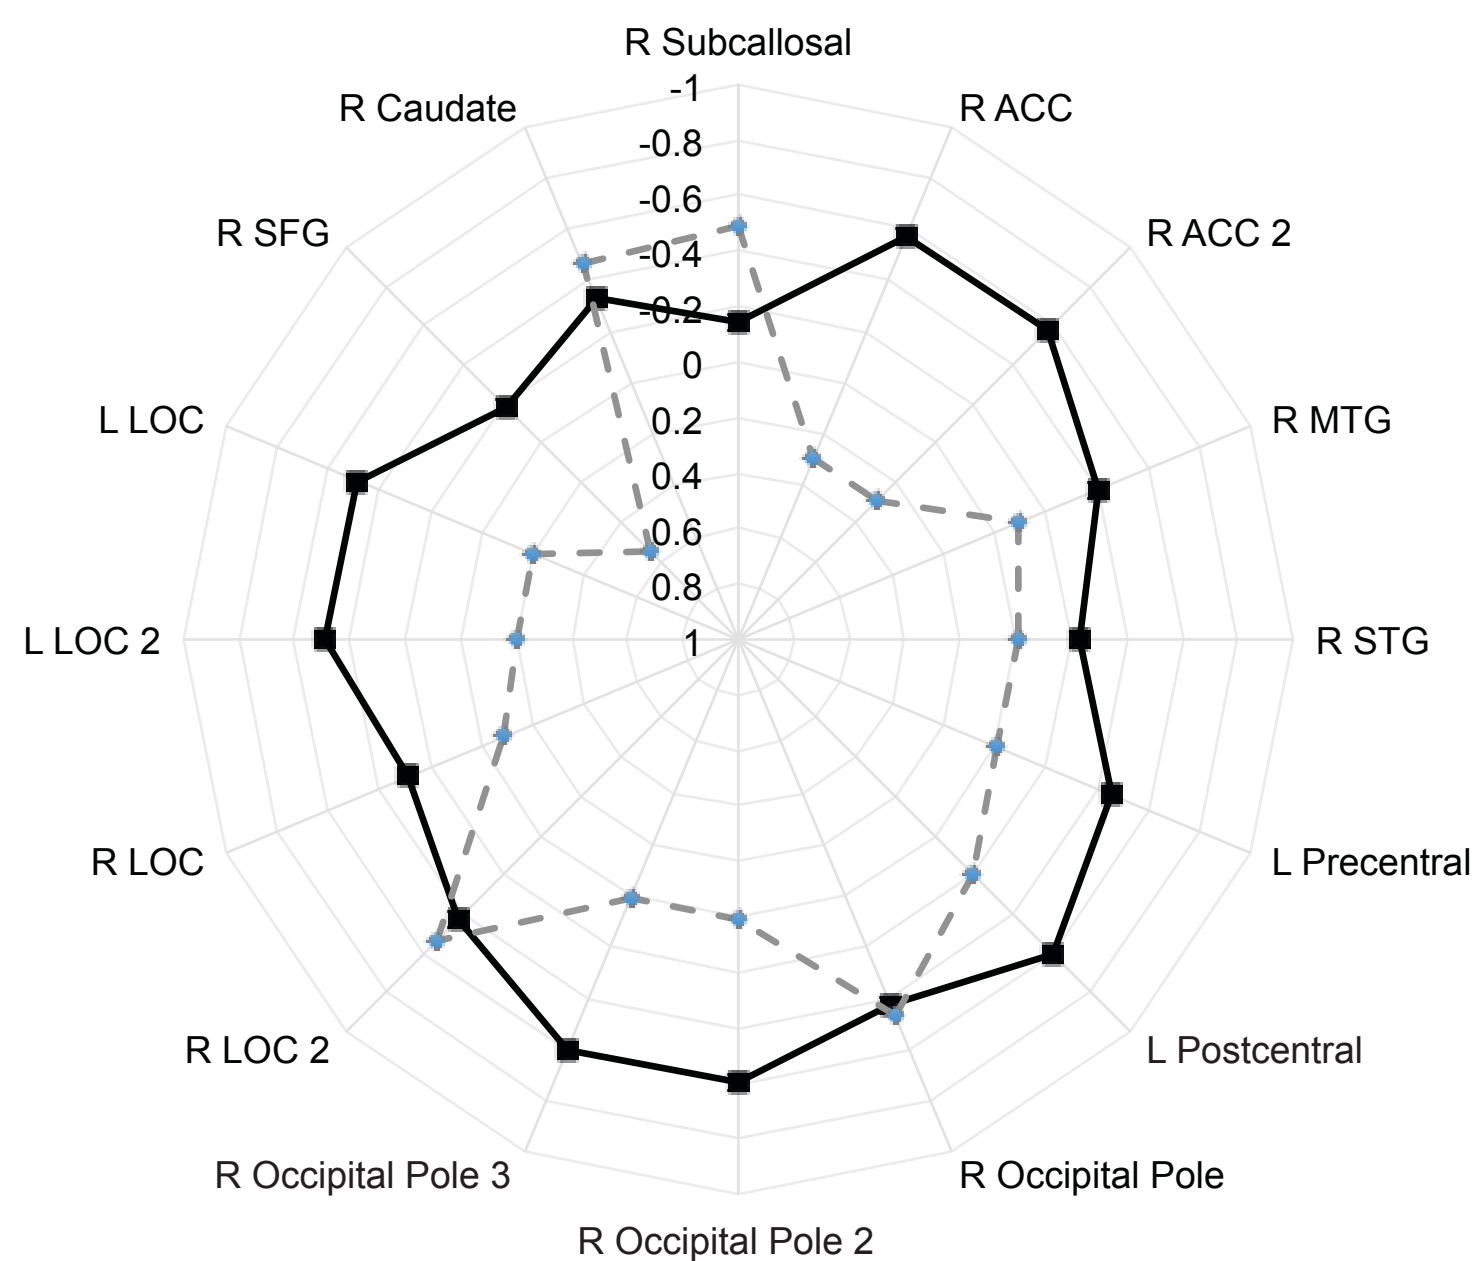

## Healthy Controls

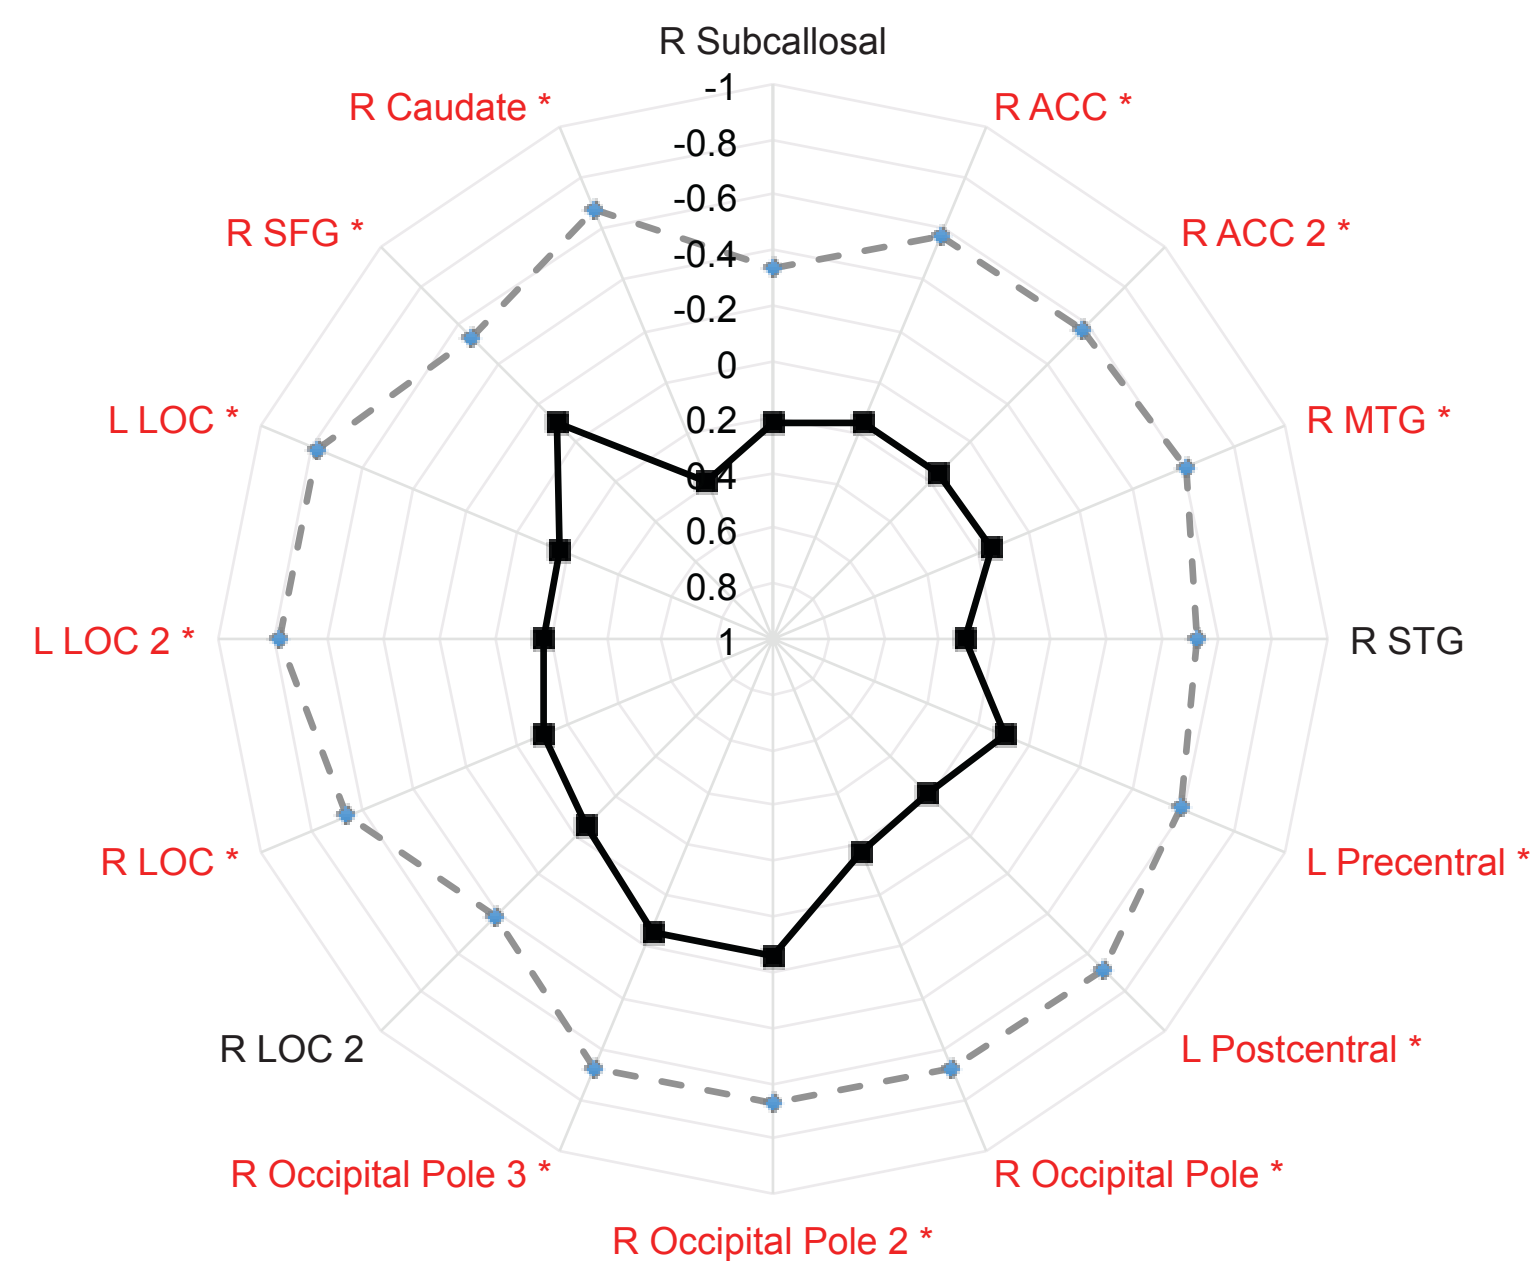

# B. Resting pVMPFC Connectivity

## Major Depressive Disorder Patients

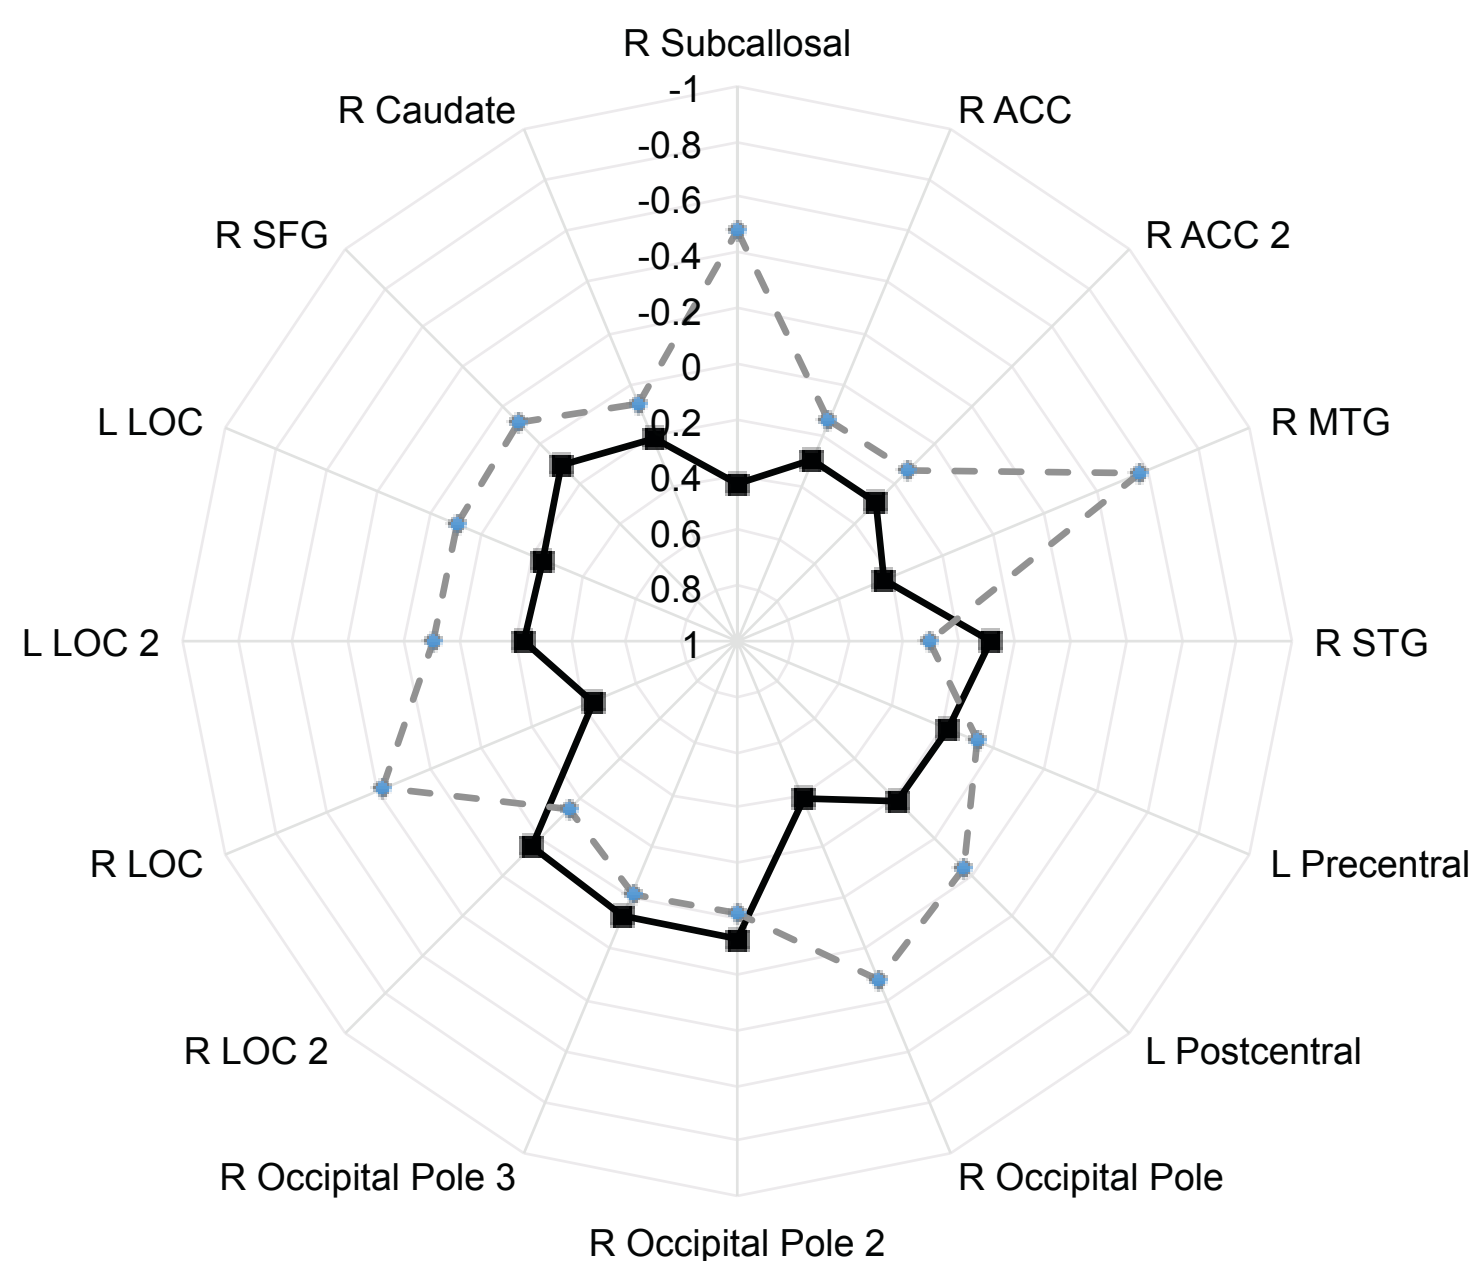

## Healthy Controls

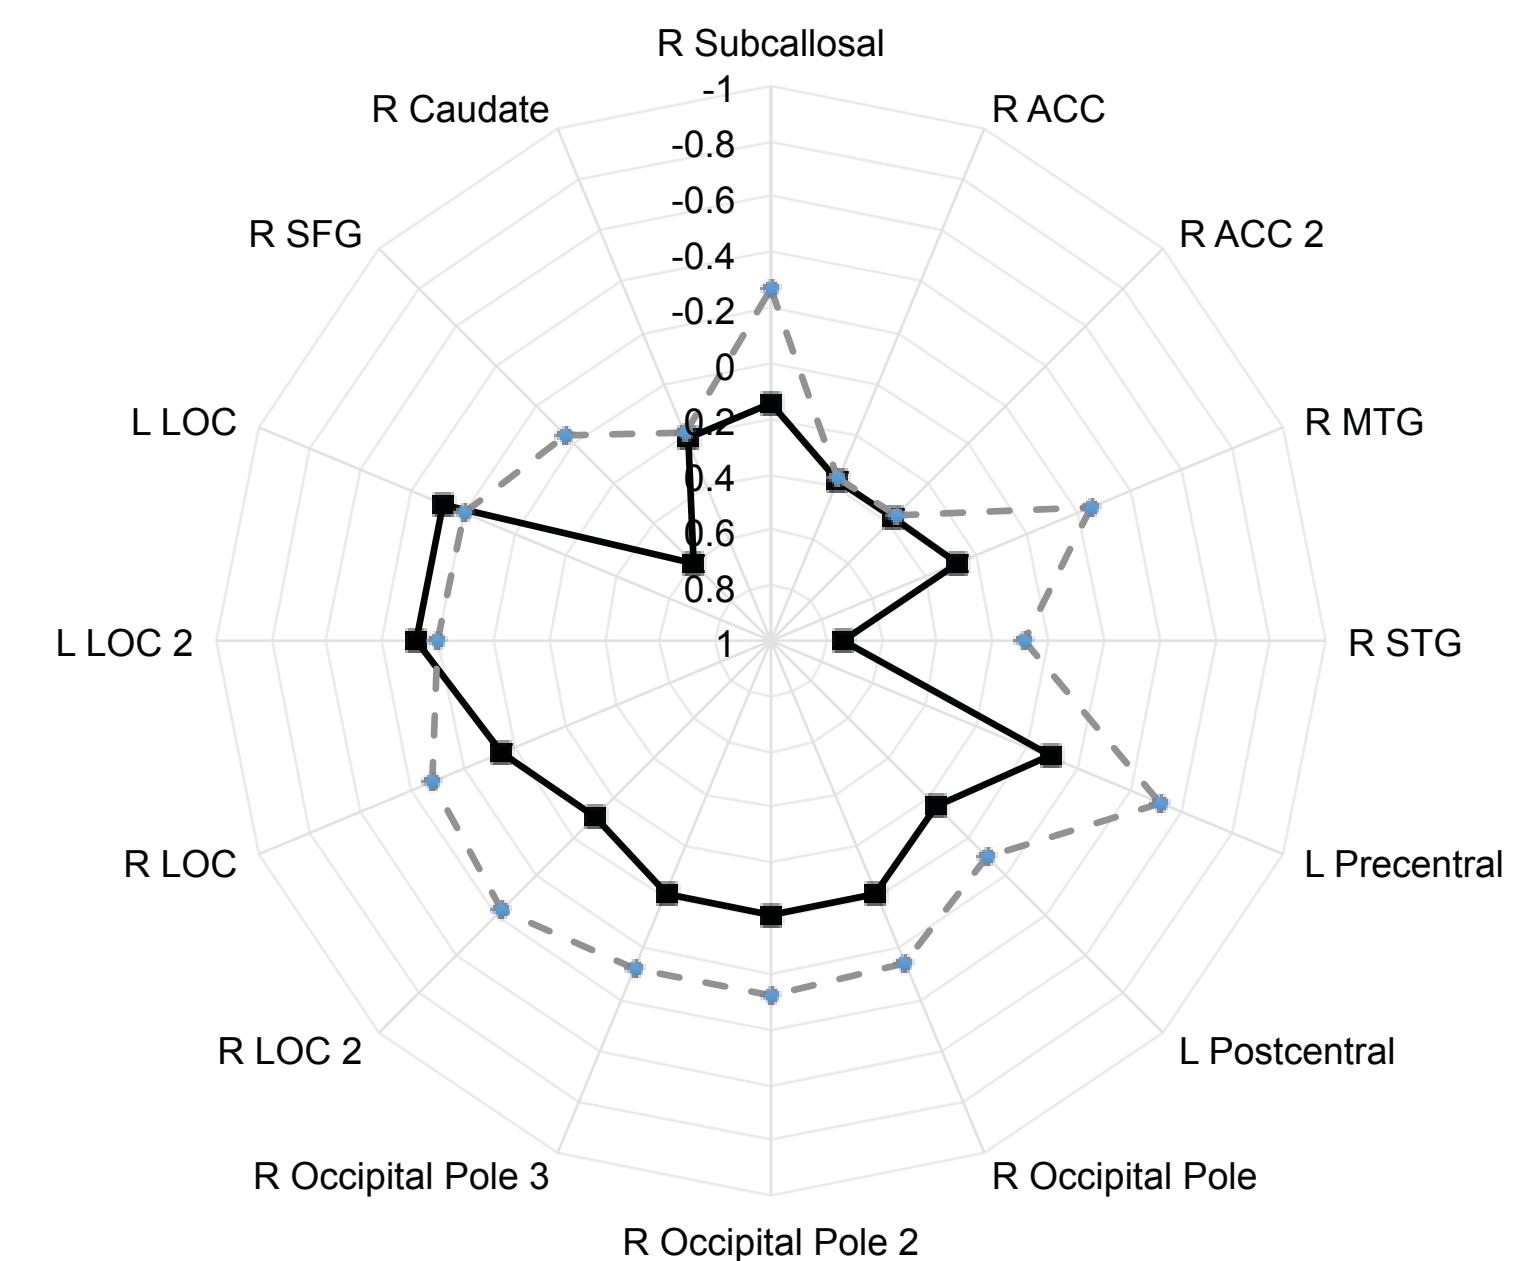

Anhedonia Partial Correlation Controlling for Age and General Distress  

 General Distress Partial Correlation Controlling for Age and Anhedonia
