# Supplementary material for: Anhedonia and general distress show dissociable ventromedial prefrontal cortex connectivity in major depressive disorder
Source: PubMed Central journal article supplement (PMC5070048; doi:10.1038/tp.2016.80), 2016-05-17

# A. Reward- and Emotion-Related Regions

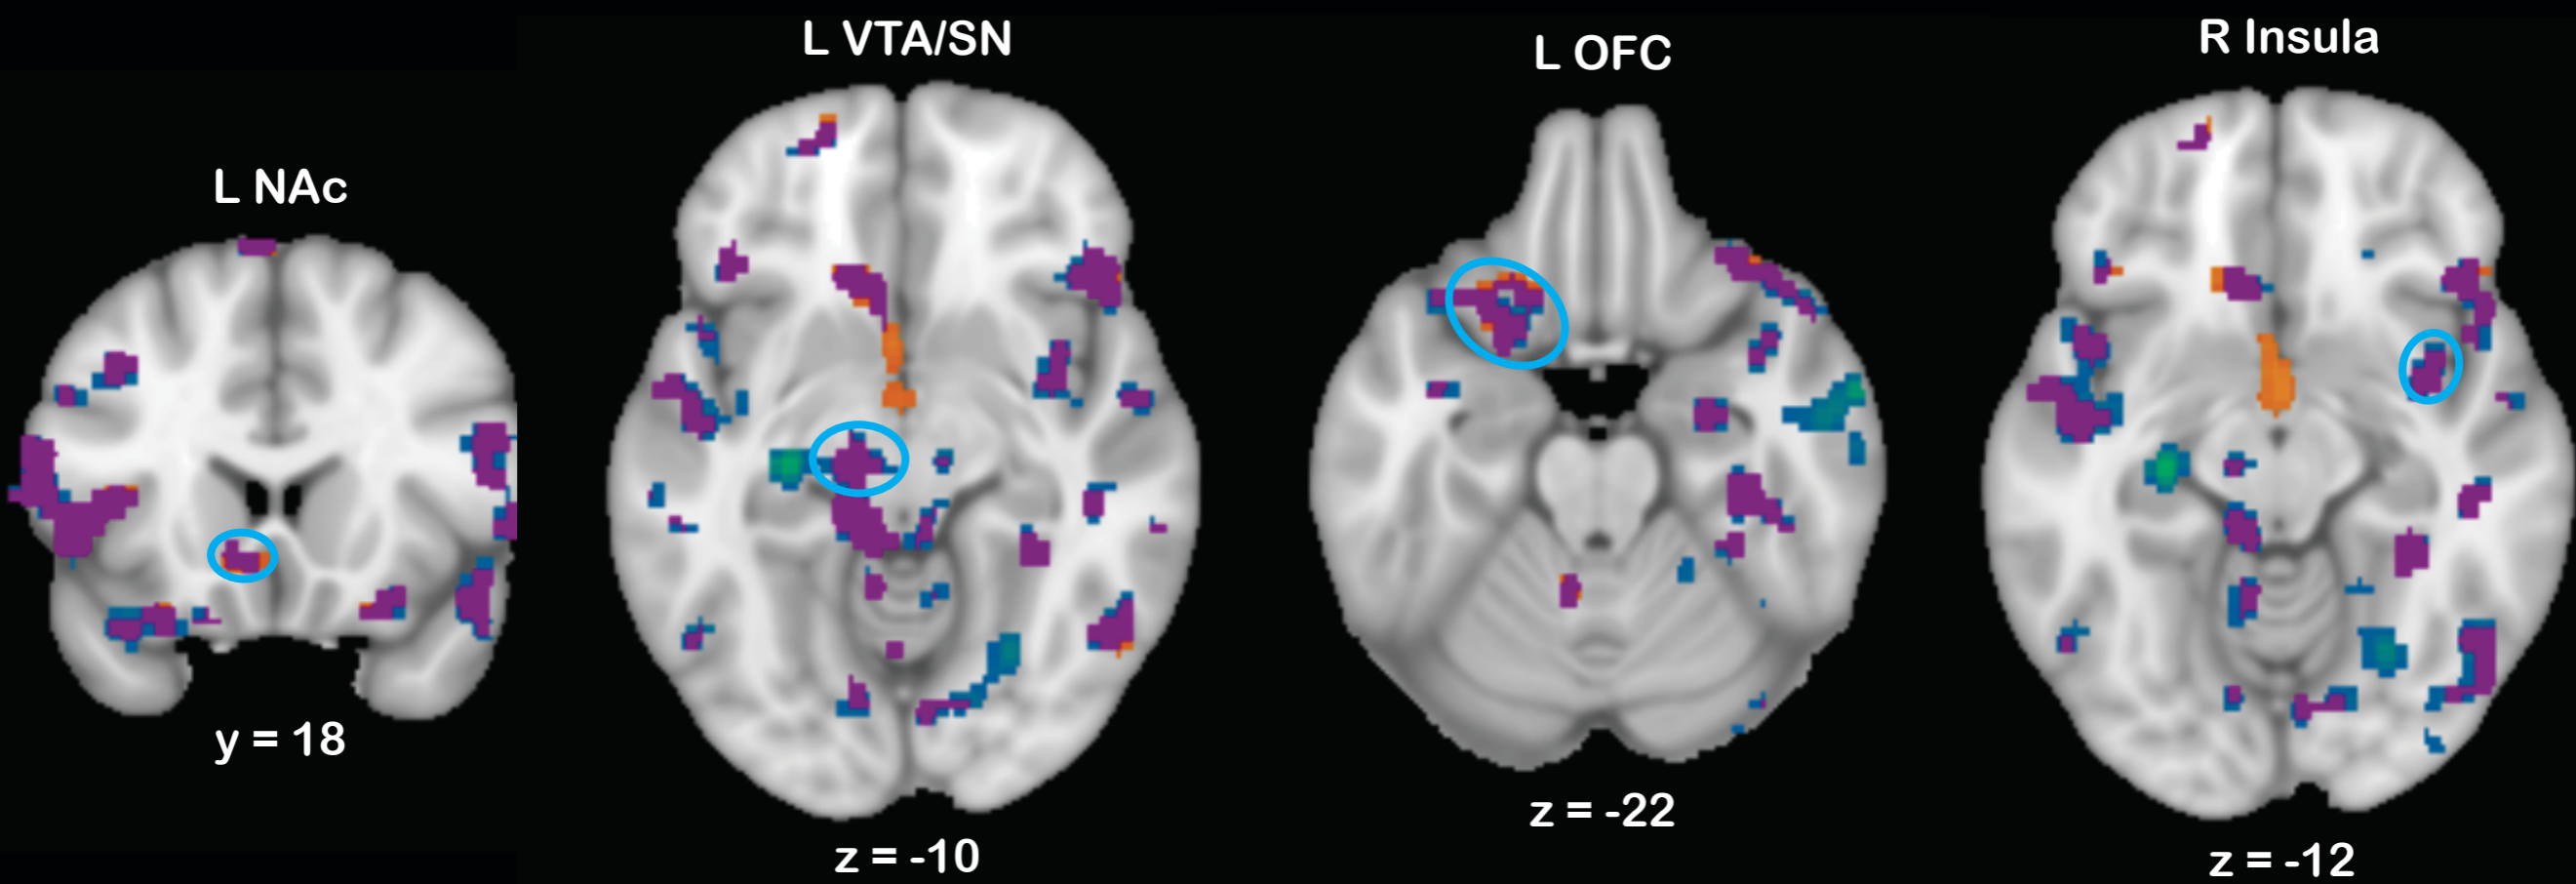

# B. Fronto-temporal Regions

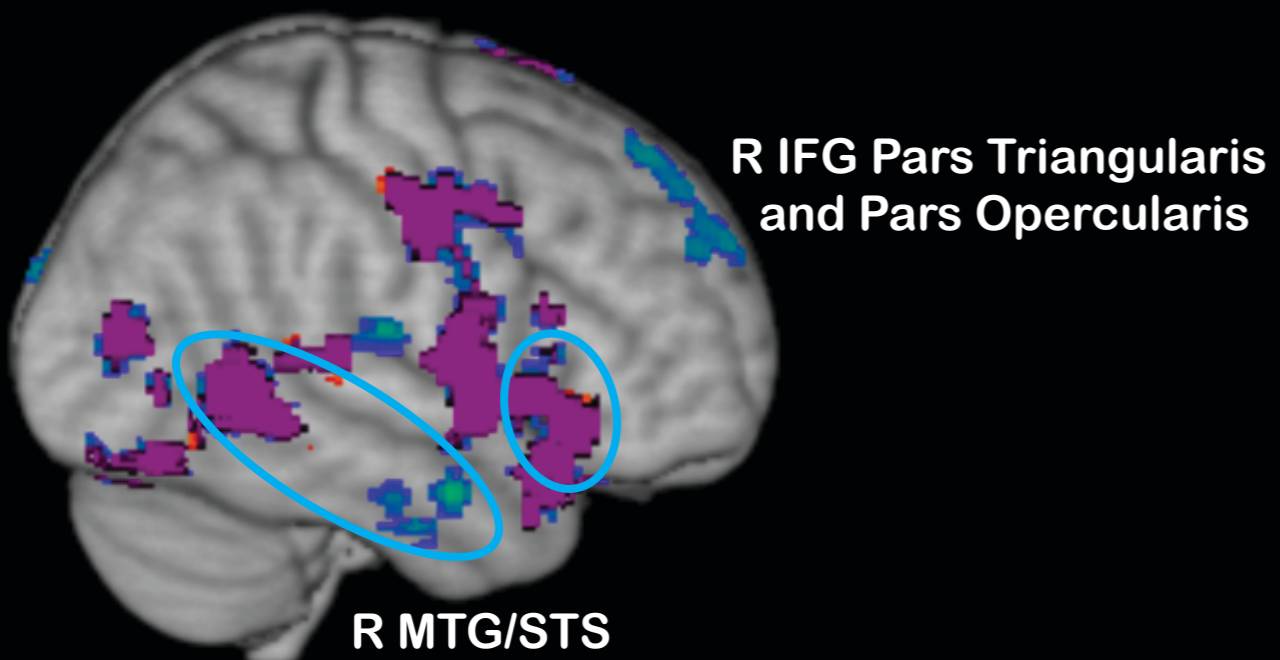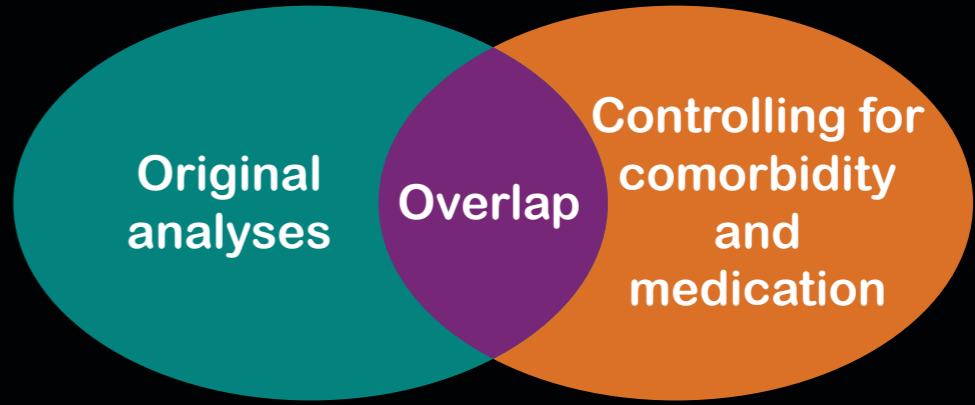

Supplement: tp201680x5.pdf [file tp201680x5.pdf]
