# Supplementary material for: Anhedonia and general distress show dissociable ventromedial prefrontal cortex connectivity in major depressive disorder
Source: PubMed Central journal article supplement (PMC5070048; doi:10.1038/tp.2016.80), 2016-05-17

R Caudate

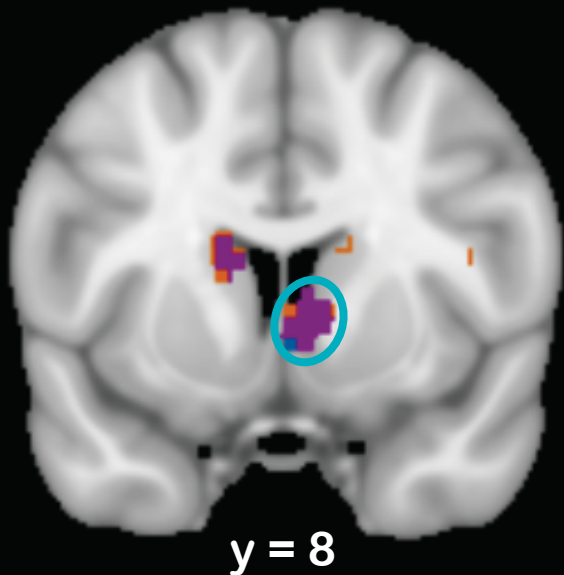

R Subcallosal Cortex

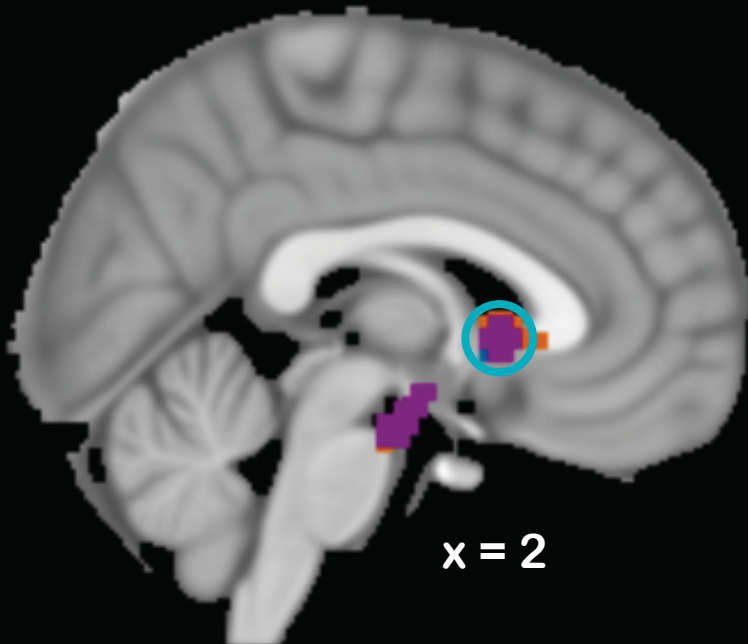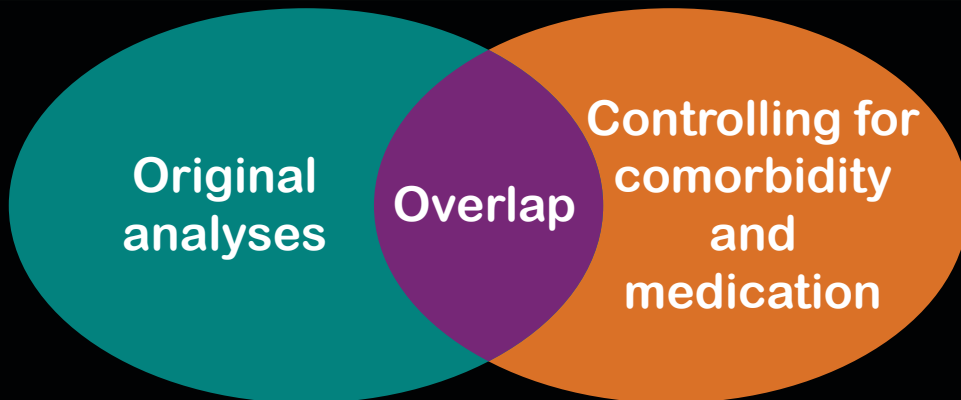

Supplement: tp201680x6.pdf [file tp201680x6.pdf]
